# Supplementary material
Source: PubMed Central journal article supplement (PMC5479753)
Supplement: NIHMS857539-supplement-Supp_Fig_S1.pdf [file NIHMS857539-supplement-Supp_Fig_S1.pdf]

# Figure S1

Human *Homo Sapiens* NP\_003268.2  
Chimpanzee *Pan troglodytes* XP\_009436065.1  
Gorilla *Gorilla gorilla gorilla* XP\_004063074.1

▼

Human MTRRARIGCFGPGGRARGTESAPEPSKRVPVPPGRSWQTQEVVRQTRGANGLGPRAGSAGAKAP  
Chimpanzee MTRRARIGCFGPGGRARGTESAPEPSKRVPVPPGRSWQTXEVVRQTRGANGLGPRARSAGAKAP  
Gorilla TTRRARIGCFGPGGRARGTEPAPEPSKRVPVPPGSSWQTXEVVRQTRGANGLGPRAGSAGAKAP  
\*\*\*\*\*

Human GPAQGAAQHGLGGSAGLRVRVSP LAMGSAALEILGLVLCLVWGGLILACGLPMWQVTAF  
Chimpanzee GPAQGAAQHGLGGSAGLRVRVSP LAMGSAALEILGLVLCLVWGGLILACGLPMWQVTAF  
Gorilla GPAQGAAQHGLGGSAGLRVRVSP LAMGSAALEILGLVLCLVWGGLILACGLPMWQVTAF  
\*\*\*\*\*

Human LDHNIIVTAQT~~TT~~WKGLWMSCVVQSTGHMQCKVYDSVLALSTEVQAARALTVSAVLLAFVAL  
Chimpanzee LDHNIIVTAQT~~TT~~WKGLWMSCVVQSTGHMQCKVYDSVLALSTEVQAARALTVSAVLLAFVAL  
Gorilla LDHNIIVTAQT~~TT~~WKGLWMSCVVQSTGHMQCKVYDSVLALSTEVQAARALTVSAVLLAFVAL  
\*\*\*\*\*

Human FVTLAQAQCTTCVAPGPAKARVALTGGVLYLFCGLLALVPLCWFANIVVREFYDPSVPVS  
Chimpanzee FVTLAQAQCTTCVAPGPAKARVALTGGVLYLFCGLLALVPLCWFANIVVREFYDPSVPVS  
Gorilla FVTLAQAQCTTCVAPGPAKARVALTGGVLYLFCGLLALVPLCWFANIVVREFYDPSVPVS  
\*\*\*\*\*

Human QKYELGAALYIGWAATALLMVGCLLCCGAWVCTGRPDLSPVKYSAPRRPTATGDYDKK  
Chimpanzee QKYELGAALYIGWAATALLMVGCLLCCGAWVCTGRPDLSPVKYSAPRRPTATGDYDKK  
Gorilla QKYELGAALYIGWAATALLMVGCLLCCGAWVCTGRPDLSPVKYSAPRRPTATGDYDKK  
\*\*\*\*\*

Human NYV  
Chimpanzee NYV  
Gorilla NYV  
\*\*\*
