# Supplementary material
Source: PubMed Central journal article supplement (PMC5479753)
Supplement: NIHMS857539-supplement-Supp_Fig_S2.pdf [file NIHMS857539-supplement-Supp_Fig_S2.pdf]

Figure S2

|            |                                |                |
|------------|--------------------------------|----------------|
| Human      | <i>Homo Sapiens</i>            | NM_001130861.1 |
| Chimpanzee | <i>Pan troglodytes</i>         | XM_009437790.2 |
| Gorilla    | <i>Gorilla gorilla gorilla</i> | XM_019018367.1 |

  

|            |                                                              |
|------------|--------------------------------------------------------------|
| Human      | -----                                                        |
| Chimpanzee | CTGGGGGCTGGGGTGCCAGGGACACCATTGCCACTGGTGGGAGGGCAGGGCACAGCCCCT |
| Gorilla    | -----                                                        |

  

|            |                                                              |
|------------|--------------------------------------------------------------|
| Human      | -----GTCTCTCCTGTCTGAAGGCCAGAGCAGGCTGCTAGGCCTGGGGCCAC         |
| Chimpanzee | CCGTGTCCCTTTTTTCTCTCCTGTCTGAAGGCCAGAGCAGGCTGCTAGGCCTGGGGCCAC |
| Gorilla    | -----                                                        |

  

|            |                                                             |
|------------|-------------------------------------------------------------|
| Human      | CACTGCCCTGGGTGCTACACCCAGTGTGCTGGGTCACTGGGAACCTTCTGAAGTGGTGT |
| Chimpanzee | CACTGCCCTGGG-TGTACACCCAGTGTGCTGGGTCACTGGGAACCTTCTGAAGTGGTGT |
| Gorilla    | -----                                                       |

  

|            |                                                             |
|------------|-------------------------------------------------------------|
| Human      | CACCTGAACTGGGCCCCAAGGATGGGGTGCGGGCAGTACCGCAGGAAGAGGAGCAGCCC |
| Chimpanzee | CACCTGAACTGGGCCCCAAGGATGGGGTGCGGGCAGTACCGCAGGAAGAGGAGCAGCCC |
| Gorilla    | -----                                                       |

  

|            |                                                             |
|------------|-------------------------------------------------------------|
| Human      | CTGTGAAGATTGAGAGGTCTGGGAAGCCCCTGCGGCTTGGGAGAGTGGGGGTGCCAGGC |
| Chimpanzee | CTGTGAAGATTGAGAGGTCTGGGAAGCCCCTGCGGCTTGGGAGAGTGGGGGTGCCAGGC |
| Gorilla    | -----                                                       |

  

|            |                                                              |
|------------|--------------------------------------------------------------|
| Human      | AGGGGGAAAGCCCCTGTGCCACCGCTTTTTGCCAGAGACTCAGGCTCCAGAGAGGCAGTG |
| Chimpanzee | AGGGGGAAAGCCCCTGTGCCACCGCTTTTTGCCAGAGACTCAGGCTCCAGAGAGGCAGTG |
| Gorilla    | -----                                                        |

  

|            |                                                               |
|------------|---------------------------------------------------------------|
| Human      | AGTGGCATGGGGGGTGAAGGCTGGGGCCCTGGGCCTGACCTCCACACGCCTGCCTGGCCTC |
| Chimpanzee | AGTGGCATGGGGGGTGAAGGCTGGGGCCCTGGGCCTGACCTCCACACGCCTGCCTGGCCTC |
| Gorilla    | -----                                                         |

  

|            |                                                             |
|------------|-------------------------------------------------------------|
| Human      | TCTGTTTGCCATGGGATGAGAGAGACAGTGTGGGACTCAGAGCGGGGCTGGAGAGTGAG |
| Chimpanzee | TCTGTTTGCCATGGGATGAGAGAGACAGTGTGGGACTCAGAGCGGGGCTGGAGAGTGAG |
| Gorilla    | -----                                                       |

  

|            |                                                             |
|------------|-------------------------------------------------------------|
| Human      | AGTGCGAGAAAGGGCCTGGGTGGGGCTTGGACCCCGGGGCGGGCTTTCTGGAGAGCCCC |
| Chimpanzee | AGTGCAAGAAAGGGCCTGGGTGGGGCTTGGACCCCGGGGCGGGCTTTCTGGAGAGCCCC |
| Gorilla    | -----                                                       |

  

|            |                                                              |
|------------|--------------------------------------------------------------|
| Human      | CTACGAGGGCCTCTACGGCGGTGACGGGGTGGGGGGCTTCTGCAAACCTTGGTCAGGGAA |
| Chimpanzee | CTACGAGGGCCTCTACGGCGGTGATGGGGTGGGGGGCTTCTGCAAACCTTGGTCAGGGAA |
| Gorilla    | -----                                                        |

  

|            |                                                              |
|------------|--------------------------------------------------------------|
| Human      | GTGGAGCTGGCTCGAGTGGAAGAGACCACCCGGCTCAGTCGGGGATGTGGGAGTGGACTG |
| Chimpanzee | GTGGAGCTGGCTCGAGTGGAAGAGACCACCCGGCTCAGTCGGGGATGTGGGAGTGGACTG |
| Gorilla    | TCGCCACTGGTGGGAGGGCAGGGCACAG-----                            |

\*    \*\*\*\*    \*\*\* \* \* \*    \*\*

  

|            |                                                              |
|------------|--------------------------------------------------------------|
| Human      | GGTGGTGCAGACTGGGGGTCGAGCGCCTTCTGAAGTGACGGGGCCGGGACGCGCAGGGAG |
| Chimpanzee | GGTGGTGCAGGCTGGGGGTCGAGCGCCTTCTGAAGTGACGGGGCCGGGACATGCAGGGAG |
| Gorilla    | -----CCCCTCCGTGTCCCTTTGTCTCTCCTGTCTGAAGGCCAGAGCAGGCTGCTAG    |

\*\*    \* \*\*\*                    \*\*\*    \*\*                    \*\*\*\* \* \* \* \* \*\*

Human GCGGCCCAAGA-AGCGCGCCCTAGGCCAGCCAGAATGCGCTCGGCCGCGACTAGGACAA  
Chimpanzee GCGGCCCAAGA-AGCGCGCCCTAGGCCAGCCAGAATGCGCTCGGCCGCGAGTAGGACAA  
Gorilla GCCTGGGGCCACCACTGCCCTGGGTGTACACCCAGTGTGCTGGGTCACTGGGAACCT--  
\*\* \* \* \*\*\*\* \* \* \* \* \* \* \* \* \* \*

Human CGGCGGGTGGGGCTGGGGGCGGCTGCCGGGCGGGGAGCGGTCCCGCGCCCTCAGCTACCC  
Chimpanzee CGGCGGGTGGGGCTGGGGGCGGCTGCCGGGCGGGGAGCGGTCCCGCGCCCTCAGCTACCC  
Gorilla CCTGAAGTGGTGTACCTGAACTGGGCCCCCAAGGATGGGCTGCGGGCAGTACCGCAGGA  
\* \*\*\*\* \* \* \* \* \* \* \* \* \* \* \* \*

Human CTCAAGAGCCGTTGTTTTCCCTAACTTCAGCTGCCAGAGGCTCTGTGATTGGCTGCGGCAC  
Chimpanzee CTCAAGAGCCGTTGTTTTCCCTAACTTCAGCTGCCAGAGGCTCTGTGATTGGCTGCGGGAC  
Gorilla AGACGAGCAGCCCCTGTGAAGACTGAGAGCTGCCAGAGGCTCTGTGATTGGCTTCGGGAC  
\* \* \* \* \*\*\*\*\* \* \* \*

Human GATGACCCGCGCACGGATTGGCTGCTTCGGGCGGGGGGCGGGCCCGGGGGACAGAATC  
Chimpanzee GATGACCCGCGCACGGATTGGCTGCTTCGGGCGGGGGGCGGGCCCGGGGGACAGAATC  
Gorilla GACGACCCGCGCACGGATTGGCTGCTTCGGGCGGGGGGCGGGCCCGGGGGACAGAACC  
\*\* \*\*\*\*\* \*

Human CGCCCCGAACCTTCAAAGAGGGTACCCCCCGGCAGGAGCTGGCAGACC CAGGAGGTGCG  
Chimpanzee CGCCCCGAACCTTCAAAGAGGGTACCCCCCGGCAGGAGCTGGCAGACC TAGGAGGTGCG  
Gorilla CGCCCCGAACCTTCAAAGAGGGTACCCCCCGGCAGCAGCTGGCAGACC TAGGAGGTGCG  
\*\*\*\*\* \*\*\*\*\* \*\*\*\*\*

Human ACAGACCCGCGGGGCAAACGGACTGGGGCCAAGAGCCGGGAGCGCGGGCGCAAAGGCACC  
Chimpanzee ACAGACCCGCGGGGCAAACGGACTGGGGCCAAGAGCCAGGAGCGCGGGCGCAAAGGCACC  
Gorilla ACAGACCCGCGGGGCAAACGGACTGGGGCCAAGAGCCGGGAGCGCGGGCGCAAAGGCACC  
\*\*\*\*\* \*\*\*\*\*

Human AGGGCCCCAGGGCGCCGCGCAGCACGGCCTTGGGGGTTCTGCGGGCCTTCGGGTGCG  
Chimpanzee AGGGCCCCAGGGCGCCGCGCAGCACGGCCTTGGGGGTTCTGCGGGCCTTCGGGTGCG  
Gorilla AGGGCCCCAGGGCGCCGCGCAGCACGGCCTTGGGGGTTCTGCGGGCCTTCGGGTGCG  
\*\*\*\*\*

Human CGTCTCGCCTCTAGCCATGGGGTCCGCAGCGTTGGAGATCCTGGGCCTGGTGTGTGCCT  
Chimpanzee CGTCTCGCCTCTAGCCATGGGGTCCGCAGCGTTGGAGATCCTGGGCCTGGTGTGTGCCT  
Gorilla CGTCTCGCCTCTAGCCATGGGGTCCGCAGCGTTGGAGATCCTGGGCCTGGTGTGTGCCT  
\*\*\*\*\*

Human GGTGGGCTGGGGGGGTCTGATCCTGGCGTGCGGGCTGCCCATGTGGCAGGTGACCGCCTT  
Chimpanzee GGTGGGCTGGGGGGGTCTGATCCTGGCGTGCGGGCTGCCCATGTGGCAGGTGACCGCCTT  
Gorilla GGTGGGCTGGGGGGGTCTGATCCTGGCGTGCGGGCTGCCCATGTGGCAGGTGACCGCCTT  
\*\*\*\*\*

Human CCTGGACCACAACATCGTGACGGCGCAGACCACCTGGAAGGGGCTGTGGATGTCTGCGT  
Chimpanzee CCTGGACCACAACATCGTGACGGCGCAGACCACCTGGAAGGGGCTGTGGATGTCTGCGT  
Gorilla CCTGGACCACAACATCGTGACGGCGCAGACCACCTGGAAGGGGCTGTGGATGTCTGCGT  
\*\*\*\*\*

Human GGTGCAGAGCACGGGCGACATGCAGTGCAAAGTGTACGACTCGGTGCTGGCTCTGAGCAC  
Chimpanzee GGTGCAGAGCACGGGCGACATGCAGTGCAAAGTGTACGACTCGGTGCTGGCTCTGAGCAC  
Gorilla GGTGCAGAGCACAGGGCGACATGCAGTGCAAAGTGTACGACTCGGTGCTGGCTCTGAGCAC  
\*\*\*\*\*

Human CGAGGTGCAGGCGGGCGGGCGCTCACCGTGAGCGCCGTGCTGCTGGCGTTCGTTGCGCT  
Chimpanzee CGAGGTGCAGGCGGGCGGGCGCTCACCGTGAGCGCCGTGCTGCTGGCGTTCGTTGCGCT  
Gorilla CGAGGTGCAGGCGGGCGGGCGCTCACCGTGAGCGCCGTGCTGCTGGCGTTCGTTGCGCT  
\*\*\*\*\*

Human CTTCTGTGACCCTGGCGGGCGCGCAGTGCACCACCTGCGTGGCCCCGGGCCCGGCCAAGGC  
Chimpanzee CTTCTGTGACCCTGGCGGGCGCGCAGTGCACCACCTGCGTGGCCCCGGGCCCGGCCAAGGC  
Gorilla CTTCTGTGACCCTGGCGGGCGCGCAGTGCACCACCTGCGTGGCCCCGGGCCCGGCCAAGGC  
\*\*\*\*\*

Human GCGTGTGGCCCTCACGGGAGGCGTGCTCTACCTGTTTTGCGGGCTGCTGGCGCTCGTGCC  
Chimpanzee GCGTGTGGCCCTCACGGGAGGCGTGCTCTACCTGTTTTGCGGGCTGCTGGCGCTCGTGCC  
Gorilla GCGTGTGGCCCTCACGGGAGGCGTGCTCTACCTGTTTTGCGGGCTGCTGGCGCTCGTGCC  
\*\*\*\*\*

Human ACTCTGCTGGTTTCGCCAACATTGTCTCGTCCGCGAGTTTTACGACCCGTCTGTGCCCGTGTG  
Chimpanzee ACTCTGCTGGTTTCGCCAACATTGTCTCGTCCGCGAGTTCTACGACCCGTCTGTGCCCGTGTG  
Gorilla ACTCTGCTGGTTTCGCCAACATTGTCTCGTCCGCGAGTTCTACGACCCGTCTGTGCCCGTGTG  
\*\*\*\*\*

Human GCAGAAGTACGAGCTGGGCGCAGCGCTGTACATCGGCTGGGCGGCCACCGCGCTGCTCAT  
Chimpanzee GCAGAAGTACGAGCTGGGCGCAGCGCTGTACATCGGCTGGGCGGCCACCGCGCTGCTCAT  
Gorilla GCAGAAGTACGAGCTGGGCGCAGCGCTGTACATCGGCTGGGCGGCCACCGCGCTGCTCAT  
\*\*\*\*\*

Human GGTAGGCGGCTGCCTCTTGTGCTGCGGGCGCCTGGGTCTGCACCGGCCGTCCCGACCTCAG  
Chimpanzee GGTAGGCGGCTGCCTCTTGTGCTGCGGGCGCCTGGGTCTGCACCGGCCGTCCCGACCTCAG  
Gorilla GGTAGGCGGCTGCCTCTTGTGCTGCGGGCGCCTGGGTCTGCACCGGCCGTCCCGACCTCAG  
\*\*\*\*\*

Human CTTCCCCGTGAAGTACTCAGCGCCGCGGGCGCCACGGCCACCGGCGACTACGACAAGAA  
Chimpanzee CTTCCCCGTGAAGTACTCAGCGCCGCGGGCGCCACGGCCACCGGCGACTACGACAAGAA  
Gorilla CTTCCCCGTGAAGTACTCAGCGCCGCGGGCGCCACGGCCACCGGCGACTACGACAAGAA  
\*\*\*\*\*

Human GAACTACGTCTGAGGGCGCTGGGCACGGCCGGGCCCTCCTGCCAGCCACGCCTGCGAGG  
Chimpanzee GAACTACGTCTGAGGGCGCTGGGCACGGCCGGGCCCTCCTGCCAGCCACGCCTGCGAGG  
Gorilla GAACTACGTCTGAGGGCGCTGGGCACGGCCGGGCCCTCCTGCCAGCCACGCCTGCGAGG  
\*\*\*\*\*

Human CGTTGGATAAGCCTGGGGAGCCCCGCATGGACCGCGGCTTCCGCCGGGTAGCGCGGGCGG  
Chimpanzee CGTTGGATAAGCCTGGGGAGCCCCGCATGGACCGCGGCTTCCGCCGGGTAGCGCGGGCGG  
Gorilla CGTTGGATAAGCCTGGGGAGCCCCGCATGGACCGCGGCTTCCGCCGGGTAGCGCGGGCGG  
\*\*\*\*\*

Human CAGGCTCCTCGGAACGTCCGGCTCTGCGCCCCGACGCGGCTCCTGGATCCGCTCCTGCCT  
Chimpanzee CAGGCTCCTCGGAACGTCCGGCTCTGCGCCCCGACGCGGCTCCTGGATCCGCTCCTGCCT  
Gorilla CAGGCTCCTCGGAACGCCCGGCTCTGCGCCCCGACGCGGCTCCTGGATCCGCTCCTGCCT  
\*\*\*\*\*

Human GCGCCCGCAGCTGACCTTCTCCTGCCACTAGCCCGGCCCTGCCCTTAACAGACGGAATGA  
Chimpanzee GCGCCCGCAGCTGGCCTTCTCCTGCCACTAGCCCGGCCCTGCCCTTAACAGACGGAATGA  
Gorilla GCGCCCGCAGCTGGACTTCTCCTGCCACTAGCCCGGCCCTGCCCTTAACAGACGGAATGA  
\*\* \*\*\*\*\*

Human A--GTTTCCTTTTCTGTGCGCGGCGCTGTTTCCATAGGCAGAGCGGGTGT CAGACTGAGG  
Chimpanzee ACAGTTTCCTTTTCTGTGCGCGGCGCTGTTTCCATAGGCAGAGCGGGTGT CAGACTGAGG  
Gorilla ACAGTTTCCTTTTCTGTGCGCGGCGCTGTTTCCATAGGCAGAGCGGGTGT CAGACTGAGG  
\* \*\*\*\*\*

Human ATTTTCGCTTCCCCTCCAAGACGCTGGGGGTCTTGGCTGCTGCCTTACTTCCCAGAGGCTC  
Chimpanzee ATTTTCGCTTCCCCTCCAAGACGCTGGGGGTCTTGGCTGCTGCCTTACTTCCCAGAGGCTC  
Gorilla ATTTTCGCTTCCCCTCCAAGACGCTGGGGGTCTTGGCTGCTGCCTTACTTCCCAGAGGCTC  
\*\*\*\*\*

Human CTGCTGACTTCGGAGGGGCGGATGCAGAGCCCAGGGCCCCCAC-CGGAAGATGTGTACAG  
Chimpanzee CTGCTGACTTCGGAGGGGCGGATGCAGAGCCCAGGGCCCCCACC GGAGAGATGTGTACAG  
Gorilla CTGCTGACTTCGGAGGGGCGGATGCAGAGCCCAGGGCCCCCACC GGAGAGATGTGTACAG  
\*\*\*\*\* \* \*\*\*\*\*

Human CTGGTCTTTACTCCATCGGCAGGGCCCCGAGCCCAGGGACCAGTGACTTGGCCTGGACCTC  
Chimpanzee CTGGTCTTTACTCCATCGGCAGGGCCCCGAGCCCAGGGACCAGTGACTTGGCCTGGACCTC  
Gorilla CTGGTCTTTACTCCATCGGCAGGGCCCCGAGCCCAGGGACCAGTGACTTGGCCTGGACCTC  
\*\*\*\*\*

Human -CCGGTCTCACTCCAGCATCTCCCCAGGCAAGGCTTGTGGGCACCGGAGCTTGAGAGAGG  
Chimpanzee -CCGGTCTCACTCCAGCATCTCCCCAGGCAAGGCTTGTGGGCACCGGAGCTTGAGAGAGG  
Gorilla CCGGTCTCACTCCAGCATCTCCCCAGGCAAGGCTTGTGGGCACCGGAGCTTGAGAGAGG  
\*\*\*\*\*

Human GCGGGAGTGGGAAGGCTAAGAATCTGCTTAGTAAATGGTTTGA ACTCTCTCCAAAAA  
Chimpanzee GCGGGAGTGGGAAGGCTAAGAATCTGCTTAGTAAATGGTTTGA ACTCTC-----  
Gorilla GCGGGAGTGGGAAGGCTAAGAATCTGCTTAGTAAATGGTTTGA ACTCTC-----  
\*\*\*\*\*

Human AAAAAAAAAA  
Chimpanzee -----  
Gorilla -----
